# Supplementary material for: Alzheimer’s Disease Frontal Cortex Mitochondria Show a Loss of Individual Respiratory Proteins but Preservation of Respiratory Supercomplexes
Source: Hindawi journal article supplement (doi:10.1155/2019/4814783), 2019-03-05

| Case                             | Neuropath Dx | Age         | RIN         | Braak Staging | CERAD Criteria |
|----------------------------------|--------------|-------------|-------------|---------------|----------------|
| 138                              | AD           | 78          | 4.0         |               |                |
| 156                              | AD           | 77          | 4.0         |               |                |
| 178                              | AD           | 77          | 6.9         |               |                |
| 190                              | AD           | 78          | 4.0         |               |                |
| 196                              | AD           | 66          | 5.0         |               | AD             |
| 208                              | AD           | 92          | 5.1         |               | AD             |
| 212                              | AD           | 90          | 4.3         |               |                |
| 215                              | AD           | 73          | 4.4         | V/VI          | AD             |
| 223                              | AD           | 69          | 4.4         |               | AD             |
| 248                              | AD           | 81          | 4.8         | V/VI          | AD             |
| <b>mean</b>                      |              | <b>78.1</b> | <b>4.7</b>  |               |                |
| <b>std dev</b>                   |              | <b>8.2</b>  | <b>0.9</b>  |               |                |
| <b>ADvsCTL RNAseq p (t-test)</b> |              | <b>0.18</b> | <b>0.97</b> |               |                |

#### RNAseq CTLs

|                |     |             |            |     |     |
|----------------|-----|-------------|------------|-----|-----|
| 137            | CTL | 63          | 5          | N/A | N/A |
| 144            | CTL | 83          | 4.9        | N/A | N/A |
| 147            | CTL | 53          | 4.9        | N/A | N/A |
| 151            | CTL | 88          | 4.7        | N/A | N/A |
| 161            | CTL | 87          | 4.6        | N/A | N/A |
| 164            | CTL | 70          | 4          | N/A | N/A |
| 191            | CTL | 71          | 4          | N/A | N/A |
| 150            | CTL | 53          | 5.3        | N/A | N/A |
| 216            | CTL | 71          |            | N/A | N/A |
| <b>mean</b>    |     | <b>71</b>   | <b>4.7</b> |     |     |
| <b>std dev</b> |     | <b>12.5</b> | <b>0.5</b> |     |     |

#### Mito Prep and immunoblot CTLs

|     |     |    |  |     |     |
|-----|-----|----|--|-----|-----|
| 137 | CTL | 63 |  | N/A | N/A |
| 144 | CTL | 83 |  | N/A | N/A |
| 142 | CTL | 62 |  | N/A | N/A |
| 159 | CTL | 45 |  | N/A | N/A |
| 213 | CTL | 61 |  | N/A | N/A |
| 164 | CTL | 70 |  | N/A | N/A |
| 191 | CTL | 71 |  | N/A | N/A |

|                                      |     |           |     |     |
|--------------------------------------|-----|-----------|-----|-----|
| <b>150</b>                           | CTL | 53        | N/A | N/A |
| <b>216</b>                           | CTL | 71        | N/A | N/A |
| <b>228</b>                           | CTL | 64        | N/A | N/A |
| <b>mean</b>                          |     | <b>64</b> |     |     |
| <b>std dev</b>                       |     | <b>10</b> |     |     |
| <b>ADvsCTL Immunoblot p (t-test)</b> |     | 0.008     |     |     |

```
cd <path to trimmed fastq files (can be gz compressed)>
hisat21 -p 4 --dta-cufflinks -x <path to genome_tran files> -1 x.forward_paired.fq -2
x.reverse_paired.fq -S <path to HISAT2 output> x.sam
cd <path to x.sam> samtools view -bS x.sam > x.bam
samtools sort -T PREFIX -o x.sorted.bam x.bam
cufflinks -o <path to cufflinks output> -G <path to genes.gtf3> genes.gtf --library-
type fr-firststrand -p 4 -u -b <path to genome.fa> genome.fa4 <path to
x.sorted.bam> x.sorted.bam
```

<sup>1</sup> download executable file and genome-tran files from  
<https://ccb.jhu.edu/software/hisat2/index.shtml> for Windows, Linux or Mac OSX.

Be sure executable file is in \$PATH

<sup>2</sup> use latest version of Samtools and be sure file is in \$PATH

<sup>3</sup> reference gene transcript file in gtf format

<sup>4</sup> reference genome file in FASTA (.fa or .fna) format

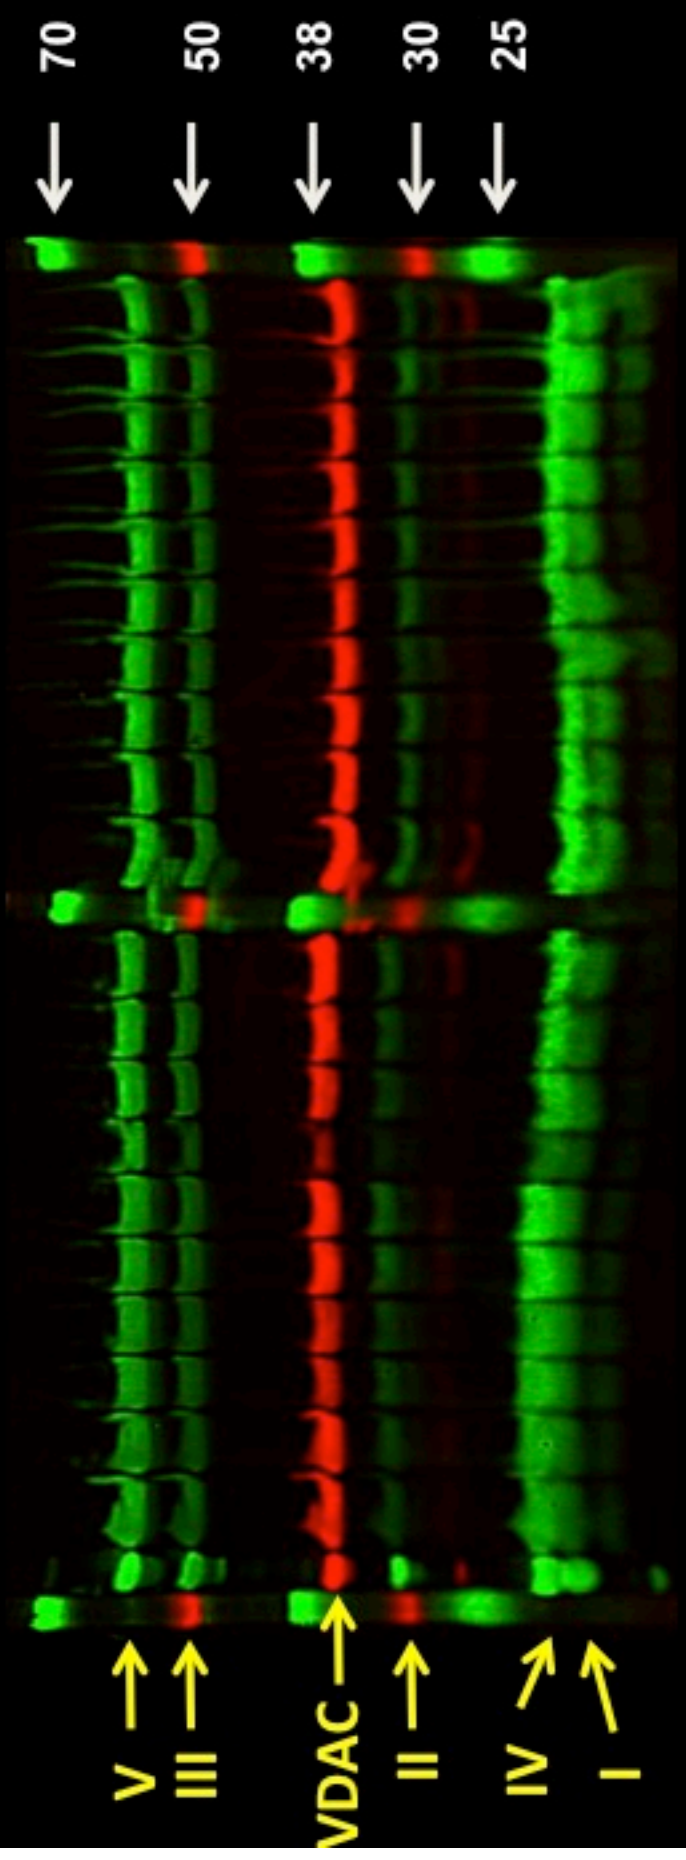

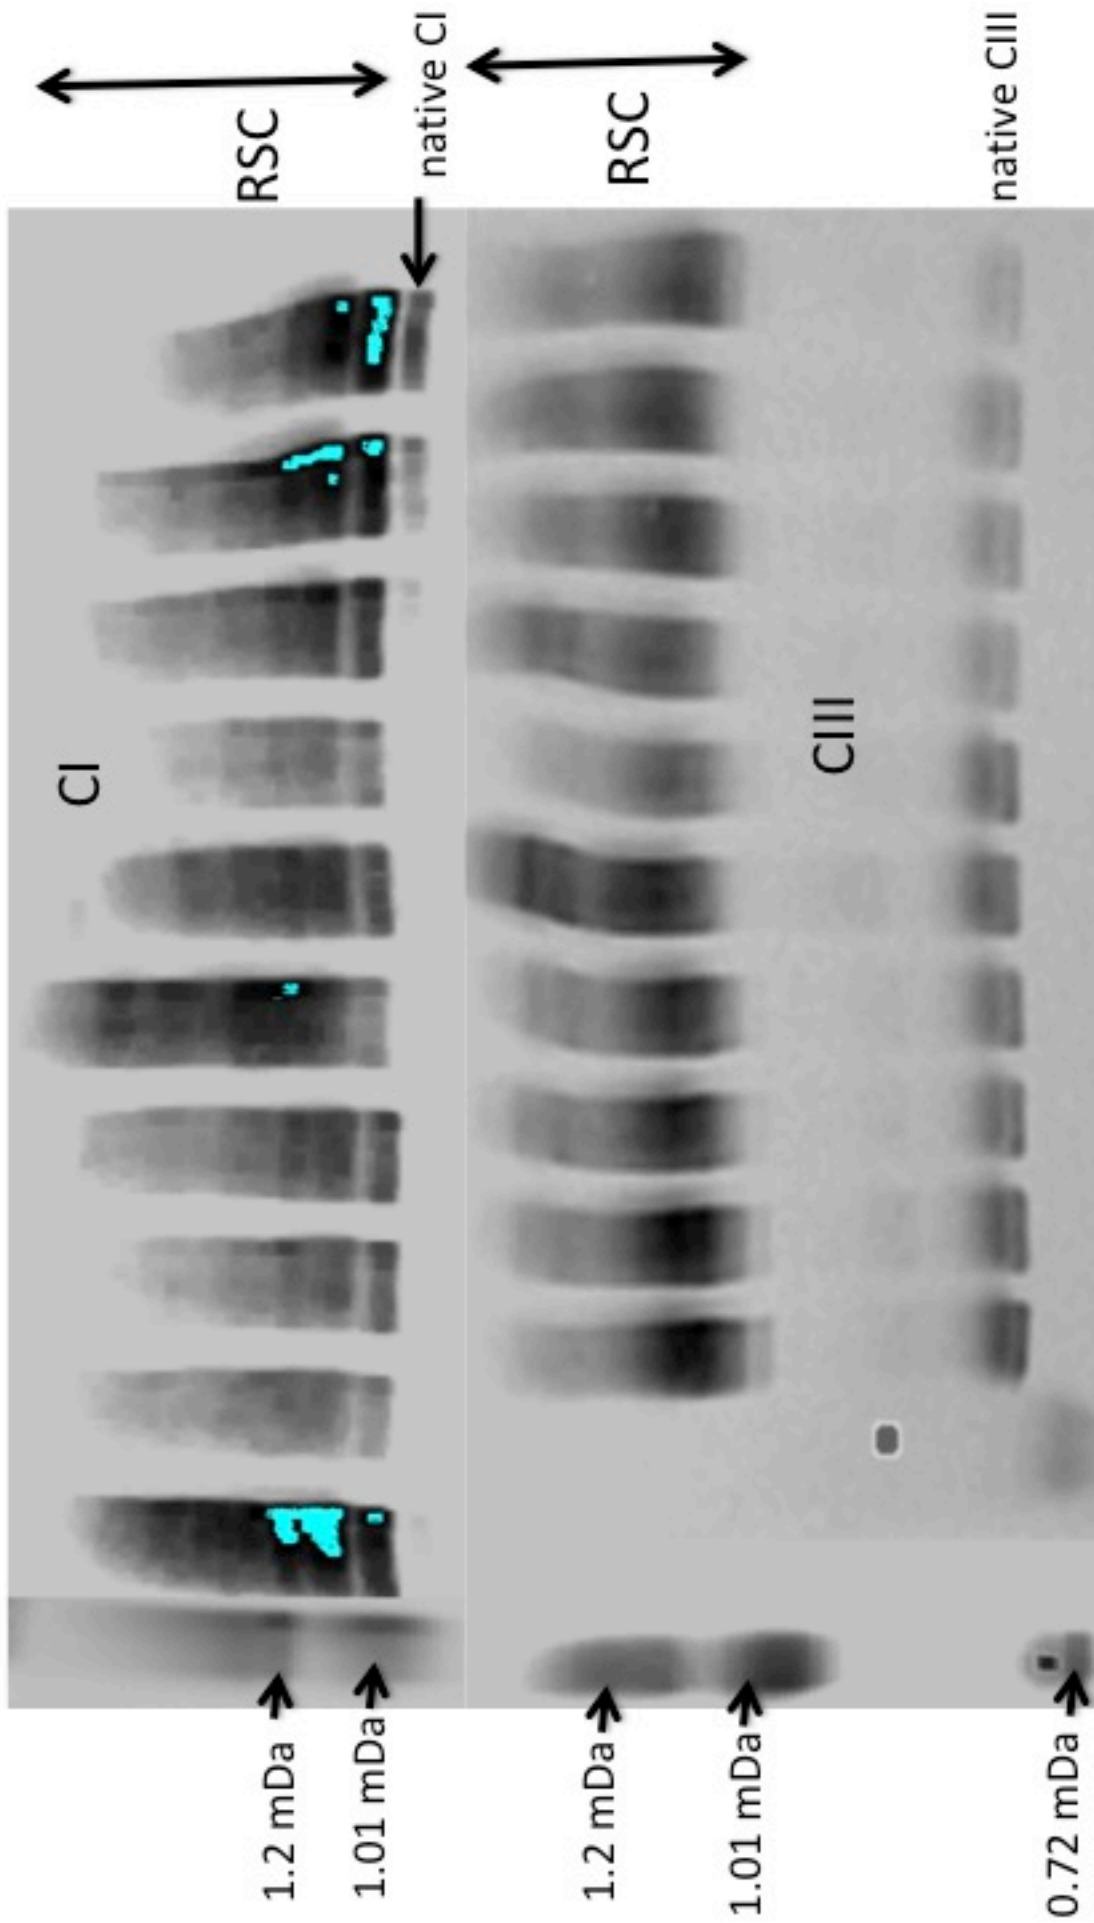

Supplement: f2 [file 4814783.f2.pdf]
