# Supplementary material for: Alzheimer’s Disease Frontal Cortex Mitochondria Show a Loss of Individual Respiratory Proteins but Preservation of Respiratory Supercomplexes
Source: Hindawi journal article supplement (doi:10.1155/2019/4814783), 2019-03-05
Supplement: f1 [file 4814783.f1.pdf]

| Case | Neuropath Dx | Age | RIN | Braak Staging | CERAD Criteria |
|------|--------------|-----|-----|---------------|----------------|
| 138  | AD           | 78  | 4.0 |               |                |
| 156  | AD           | 77  | 4.0 |               |                |
| 178  | AD           | 77  | 6.9 |               |                |
| 190  | AD           | 78  | 4.0 |               |                |
| 196  | AD           | 66  | 5.0 |               | AD             |
| 208  | AD           | 92  | 5.1 |               | AD             |
| 212  | AD           | 90  | 4.3 |               |                |
| 215  | AD           | 73  | 4.4 | V/VI          | AD             |
| 223  | AD           | 69  | 4.4 |               | AD             |
| 248  | AD           | 81  | 4.8 | V/VI          | AD             |

|                           |      |      |
|---------------------------|------|------|
| mean                      | 78.1 | 4.7  |
| std dev                   | 8.2  | 0.9  |
| ADvsCTL RNAseq p (t-test) | 0.18 | 0.97 |

#### RNAseq CTLs

|         |     |      |     |     |     |
|---------|-----|------|-----|-----|-----|
| 137     | CTL | 63   | 5   | N/A | N/A |
| 144     | CTL | 83   | 4.9 | N/A | N/A |
| 147     | CTL | 53   | 4.9 | N/A | N/A |
| 151     | CTL | 88   | 4.7 | N/A | N/A |
| 161     | CTL | 87   | 4.6 | N/A | N/A |
| 164     | CTL | 70   | 4   | N/A | N/A |
| 191     | CTL | 71   | 4   | N/A | N/A |
| 150     | CTL | 53   | 5.3 | N/A | N/A |
| 216     | CTL | 71   |     | N/A | N/A |
| mean    |     | 71   | 4.7 |     |     |
| std dev |     | 12.5 | 0.5 |     |     |

#### Mito Prep and immunoblot CTLs

|     |     |    |  |     |     |
|-----|-----|----|--|-----|-----|
| 137 | CTL | 63 |  | N/A | N/A |
| 144 | CTL | 83 |  | N/A | N/A |
| 142 | CTL | 62 |  | N/A | N/A |
| 159 | CTL | 45 |  | N/A | N/A |
| 213 | CTL | 61 |  | N/A | N/A |
| 164 | CTL | 70 |  | N/A | N/A |
| 191 | CTL | 71 |  | N/A | N/A |

|                                      |     |           |     |     |
|--------------------------------------|-----|-----------|-----|-----|
| <b>150</b>                           | CTL | 53        | N/A | N/A |
| <b>216</b>                           | CTL | 71        | N/A | N/A |
| <b>228</b>                           | CTL | 64        | N/A | N/A |
| <b>mean</b>                          |     | <b>64</b> |     |     |
| <b>std dev</b>                       |     | <b>10</b> |     |     |
| <b>ADvsCTL Immunoblot p (t-test)</b> |     | 0.008     |     |     |
