# Supplementary material for: Alzheimer’s Disease Frontal Cortex Mitochondria Show a Loss of Individual Respiratory Proteins but Preservation of Respiratory Supercomplexes
Source: Hindawi journal article supplement (doi:10.1155/2019/4814783), 2019-03-05

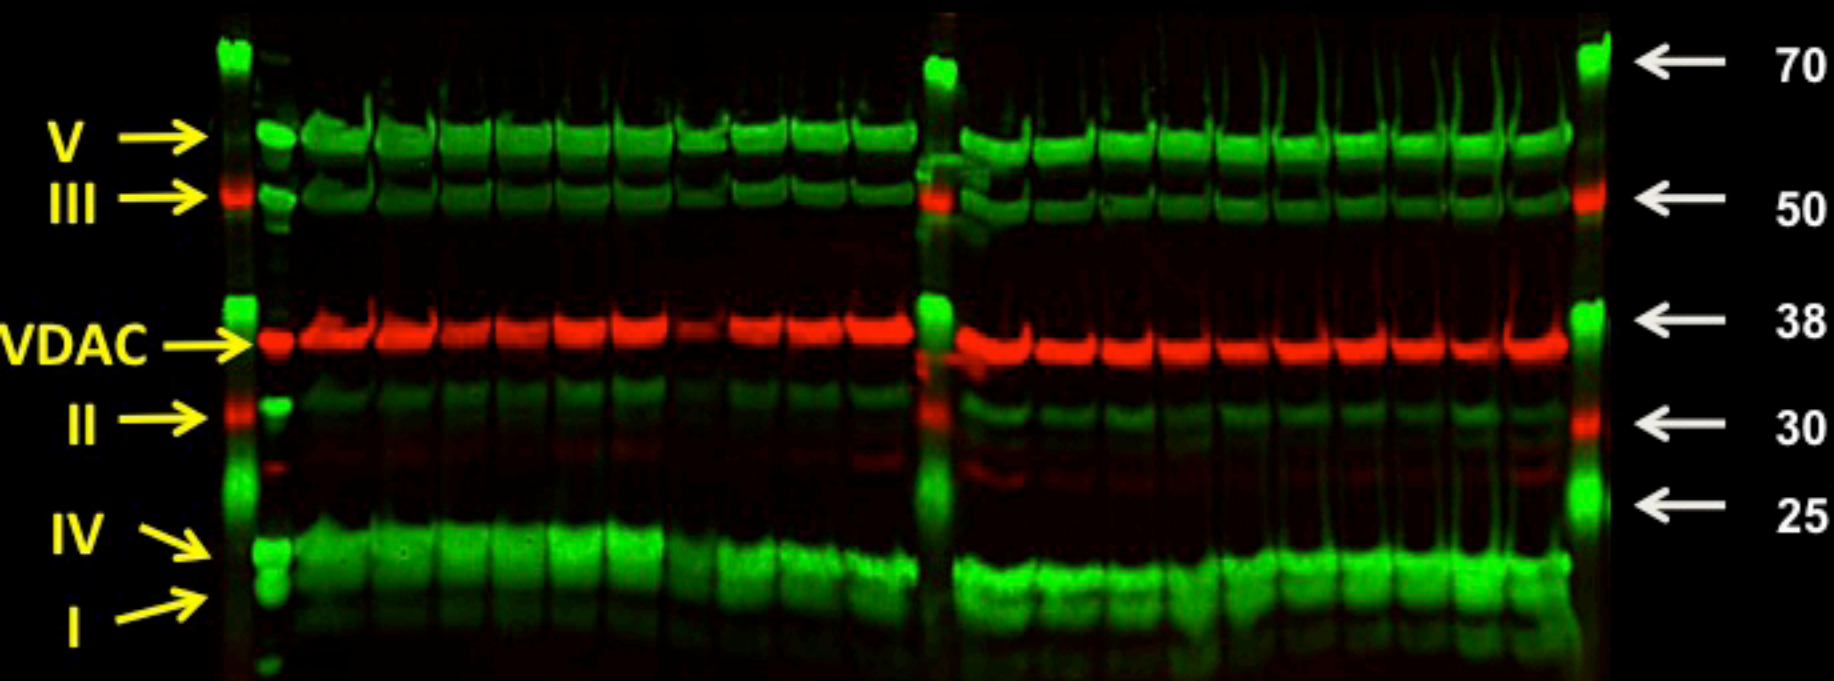

Supplement: f3 [file 4814783.f3.pdf]
